# Supplementary material for: Lipid Aberrations in Lichen Planus
Source: Metabolites. 2022 Oct 22;12(11):1008. doi: 10.3390/metabo12111008 (PMC9693399; doi:10.3390/metabo12111008)
Supplement: Supplementary file 1 [file metabolites-12-01008-s001.zip › metabolites-1969054-supplementary.pdf]

**Table S1.** The summary of studies included into our review.

| Cited Reference | Sample Size                  | Origin  | Involvement by LP                      |
|-----------------|------------------------------|---------|----------------------------------------|
| [1]             | 90 patients; 90 controls     | Nigeria | cutaneous, mucosal, nail               |
| [5]             | 49 patients; 99 controls     | Turkey  | cutaneous, mucosal                     |
| [6]             | 40 patients; 40 controls     | Iran    | cutaneous, mucosal                     |
| [7]             | 40 patients; 40 controls     | India   | cutaneous, mucosal                     |
| [13]            | 100 patients; 50 controls    | India   | cutaneous, mucosal                     |
| [14]            | 70 patients; no controls     | India   | cutaneous, mucosal                     |
| [18]            | 80 patients; 80 controls     | Spain   | cutaneous, mucosal, nail, scalp        |
| [19]            | 40 patients; 40 controls     | Egypt   | cutaneous                              |
| [20]            | 43 patients; 43 controls     | Iran    | cutaneous, mucosal, scalp              |
| [21]            | 98 patients, 99 controls     | Turkey  | cutaneous, mucosal, nail, scalp        |
| [22]            | 75 patients; 75 controls     | India   | cutaneous, mucosal, scalp              |
| [23]            | 1477 patients; 2856 controls | Israel  | not specified                          |
| [20]            | 54 patients; 50 controls     | Turkey  | cutaneous, mucosal                     |
| [25]            | 30 patients; 30 patients     | Turkey  | cutaneous                              |
| [26]            | 110 patients; 120 controls   | Egypt   | cutaneous, mucosal                     |
| [27]            | 110 patients; 120 controls   | Egypt   | cutaneous, mucosal                     |
| [28]            | 90 patients; 30 controls     | Turkey  | cutaneous, mucosal                     |
| [29]            | 79 patients; 79 controls     | Turkey  | cutaneous, mucosal, nail               |
| [30]            | 18 patients; 14 controls     | India   | mucosal LP or oral lichenoid reactions |
| [31]            | 44 patients; 44 controls     | Iran    | mucosal                                |
| [32]            | 18 patients; 18 controls     | Romania | mucosal                                |
| [33]            | 200 patients; 200 controls   | Spain   | mucosal                                |
| [34]            | 33 patients; 32 controls     | Spain   | mucosal                                |
| [35]            | 187 patients; 56 controls    | USA     | scalp                                  |
